# Supplementary material for: Population-specific sex and size variation in long-term foraging ecology of belugas and narwhals
Source: PubMed Central journal article supplement (PMC8074634; doi:10.1098/rsos.202226), 2021-02-03
Supplement: rsos202226_review_history.pdf [file rsos202226_review_history.pdf]

## **Population-specific sex and size variation in long-term foraging ecology of belugas and narwhals**

Marie Louis, Mikkel Skovrind, Eva Garde, Mads Peter Heide-Jørgensen, Paul Szpak and Eline D. Lorenzen

### **Article citation details**

*R. Soc. open sci.* **8**: 202226.

<http://dx.doi.org/10.1098/rsos.202226>

### **Review timeline**

Original submission: 7 December 2020

Revised submission: 7 January 2021

Final acceptance: 11 January 2021

Note: Reports are unedited and appear as submitted by the referee. The review history appears in chronological order.

Note: This manuscript was transferred from another Royal Society journal with peer review.

## Review History

### RSOS-202226.R0 (Original submission)

#### Review form: Reviewer 1

**Is the manuscript scientifically sound in its present form?**

Yes

**Are the interpretations and conclusions justified by the results?**

Yes

**Is the language acceptable?**

Yes

**Do you have any ethical concerns with this paper?**

No

**Have you any concerns about statistical analyses in this paper?**

No

**Recommendation?**

Accept with minor revision (please list in comments)

**Comments to the Author(s)**

I have re-reviewed (I was reviewer 2 in Biology Letters submission) the paper by Louis et al. on sex- and size-based variation in foraging ecology of belugas and narwhals across space. They have done a great job incorporating previous reviewer comments and I only have one minor comment. I look forward to seeing this article published in Royal Society Open Science.

Line 87-90 – In this objectives sentence - I suggesting removing the inference in the ability to test for differences in foraging ecology of beluga and narwhal in relation to interspecific competition. Again, this is not directly tested in this study due to the lack of prey availability and prey abundance data. I think it's fine to have the listed objective as, "To elucidate differences related to sex and size, we investigated whether beluga and narwhal foraging ecology differs across space" and to just speculate on the potential competition aspects between beluga and narwhal in the discussion.

**Review form: Reviewer 2**

**Is the manuscript scientifically sound in its present form?**

Yes

**Are the interpretations and conclusions justified by the results?**

Yes

**Is the language acceptable?**

Yes

**Do you have any ethical concerns with this paper?**

No

**Have you any concerns about statistical analyses in this paper?**

No

**Recommendation?**

Accept as is

**Comments to the Author(s)**

After reading the revised manuscript by Louis et al., I maintain my earlier assessment, that the paper is concise, well-written and neatly presented. I found the methods and statistical analyses to be appropriate and well-conducted.

I appreciate the thoughtful and thorough manner with which the authors responded to my previous general and specific comments. They have adequately addressed the concerns I had and therefore I have no comments on the revised version.

I believe that the manuscript represents a valuable contribution to the literature on cetacean resource use.

## Decision letter (RSOS-202226.R0)

The editorial office reopened on 4 January 2021. We are working hard to catch up after the festive break. If you need advice or an extension to a deadline, please do not hesitate to let us know -- we will continue to be as flexible as possible to accommodate the changing COVID situation. We wish you a happy New Year, and hope 2021 proves to be a better year for everyone.

Dear Dr Louis

On behalf of the Editors, we are pleased to inform you that your Manuscript RSOS-202226 "Population-specific sex and size variation in long-term foraging ecology of belugas and narwhals" has been accepted for publication in Royal Society Open Science subject to minor revision in accordance with the referees' reports. Please find the referees' comments along with any feedback from the Editors below my signature.

We invite you to respond to the comments and revise your manuscript. Below the referees' and Editors' comments (where applicable) we provide additional requirements. Final acceptance of your manuscript is dependent on these requirements being met. We provide guidance below to help you prepare your revision.

Please submit your revised manuscript and required files (see below) no later than 7 days from today's (ie 06-Jan-2021) date. Note: the ScholarOne system will 'lock' if submission of the revision is attempted 7 or more days after the deadline. If you do not think you will be able to meet this deadline please contact the editorial office immediately.

Please note article processing charges apply to papers accepted for publication in Royal Society Open Science (<https://royalsocietypublishing.org/rsos/charges>). Charges will also apply to papers transferred to the journal from other Royal Society Publishing journals, as well as papers submitted as part of our collaboration with the Royal Society of Chemistry (<https://royalsocietypublishing.org/rsos/chemistry>). Fee waivers are available but must be requested when you submit your revision (<https://royalsocietypublishing.org/rsos/waivers>).

Thank you for submitting your manuscript to Royal Society Open Science and we look forward to receiving your revision. If you have any questions at all, please do not hesitate to get in touch.

Kind regards,  
Royal Society Open Science Editorial Office  
Royal Society Open Science  
[openscience@royalsociety.org](mailto:openscience@royalsociety.org)

on behalf of Prof Pete Smith (Subject Editor)  
[openscience@royalsociety.org](mailto:openscience@royalsociety.org)

Reviewer comments to Author:

Reviewer: 1

Comments to the Author(s)

I have re-reviewed (I was reviewer 2 in Biology Letters submission) the paper by Louis et al. on sex- and size-based variation in foraging ecology of belugas and narwhals across space. They have done a great job incorporating previous reviewer comments and I only have one minor comment. I look forward to seeing this article published in Royal Society Open Science.

Line 87-90 – In this objectives sentence - I suggesting removing the inference in the ability to test for differences in foraging ecology of beluga and narwhal in relation to interspecific competition. Again, this is not directly tested in this study due to the lack of prey availability and prey abundance data. I think it's fine to have the listed objective as, "To elucidate differences related to sex and size, we investigated whether beluga and narwhal foraging ecology differs across space" and to just speculate on the potential competition aspects between beluga and narwhal in the discussion.

Reviewer: 2

Comments to the Author(s)

After reading the revised manuscript by Louis et al., I maintain my earlier assessment, that the paper is concise, well-written and neatly presented. I found the methods and statistical analyses to be appropriate and well-conducted.

I appreciate the thoughtful and thorough manner with which the authors responded to my previous general and specific comments. They have adequately addressed the concerns I had and therefore I have no comments on the revised version.

I believe that the manuscript represents a valuable contribution to the literature on cetacean resource use.

===PREPARING YOUR MANUSCRIPT===

Your revised paper should include the changes requested by the referees and Editors of your manuscript. You should provide two versions of this manuscript and both versions must be provided in an editable format:

one version identifying all the changes that have been made (for instance, in coloured highlight, in bold text, or tracked changes);

a 'clean' version of the new manuscript that incorporates the changes made, but does not highlight them. This version will be used for typesetting.

Please ensure that any equations included in the paper are editable text and not embedded images.

Please ensure that you include an acknowledgements' section before your reference list/bibliography. This should acknowledge anyone who assisted with your work, but does not qualify as an author per the guidelines at <https://royalsociety.org/journals/ethics-policies/openness/>.

While not essential, it will speed up the preparation of your manuscript proof if you format your references/bibliography in Vancouver style (please see <https://royalsociety.org/journals/authors/author-guidelines/#formatting>). You should include DOIs for as many of the references as possible.

If you have been asked to revise the written English in your submission as a condition of publication, you must do so, and you are expected to provide evidence that you have received language editing support. The journal would prefer that you use a professional language editing service and provide a certificate of editing, but a signed letter from a colleague who is a native speaker of English is acceptable. Note the journal has arranged a number of discounts for authors using professional language editing services (<https://royalsociety.org/journals/authors/benefits/language-editing/>).

### ===PREPARING YOUR REVISION IN SCHOLARONE===

To revise your manuscript, log into <https://mc.manuscriptcentral.com/rsos> and enter your Author Centre - this may be accessed by clicking on "Author" in the dark toolbar at the top of the page (just below the journal name). You will find your manuscript listed under "Manuscripts with Decisions". Under "Actions", click on "Create a Revision".

Attach your point-by-point response to referees and Editors at Step 1 'View and respond to decision letter'. This document should be uploaded in an editable file type (.doc or .docx are preferred). This is essential.

Please ensure that you include a summary of your paper at Step 2 'Type, Title, & Abstract'. This should be no more than 100 words to explain to a non-scientific audience the key findings of your research. This will be included in a weekly highlights email circulated by the Royal Society press office to national UK, international, and scientific news outlets to promote your work.

At Step 3 'File upload' you should include the following files:

-- Your revised manuscript in editable file format (.doc, .docx, or .tex preferred). You should upload two versions:

- 1) One version identifying all the changes that have been made (for instance, in coloured highlight, in bold text, or tracked changes);
- 2) A 'clean' version of the new manuscript that incorporates the changes made, but does not highlight them.

-- An individual file of each figure (EPS or print-quality PDF preferred [either format should be produced directly from original creation package], or original software format).

-- An editable file of each table (.doc, .docx, .xls, .xlsx, or .csv).

-- An editable file of all figure and table captions.

Note: you may upload the figure, table, and caption files in a single Zip folder.

-- Any electronic supplementary material (ESM).

-- If you are requesting a discretionary waiver for the article processing charge, the waiver form must be included at this step.

-- If you are providing image files for potential cover images, please upload these at this step, and inform the editorial office you have done so. You must hold the copyright to any image provided.

-- A copy of your point-by-point response to referees and Editors. This will expedite the preparation of your proof.

At Step 6 'Details & comments', you should review and respond to the queries on the electronic submission form. In particular, we would ask that you do the following:

-- Ensure that your data access statement meets the requirements at

<https://royalsociety.org/journals/authors/author-guidelines/#data>. You should ensure that you cite the dataset in your reference list. If you have deposited data etc in the Dryad repository, please only include the 'For publication' link at this stage. You should remove the 'For review' link.

-- If you are requesting an article processing charge waiver, you must select the relevant waiver option (if requesting a discretionary waiver, the form should have been uploaded at Step 3 'File upload' above).

-- If you have uploaded ESM files, please ensure you follow the guidance at

<https://royalsociety.org/journals/authors/author-guidelines/#supplementary-material> to include a suitable title and informative caption. An example of appropriate titling and captioning may be found at [https://figshare.com/articles/Table\\_S2\\_from\\_Is\\_there\\_a\\_trade-off\\_between\\_peak\\_performance\\_and\\_performance\\_breadth\\_across\\_temperatures\\_for\\_aerobic\\_scope\\_in\\_teleost\\_fishes\\_/3843624](https://figshare.com/articles/Table_S2_from_Is_there_a_trade-off_between_peak_performance_and_performance_breadth_across_temperatures_for_aerobic_scope_in_teleost_fishes_/3843624).

At Step 7 'Review & submit', you must view the PDF proof of the manuscript before you will be able to submit the revision. Note: if any parts of the electronic submission form have not been completed, these will be noted by red message boxes.

## Author's Response to Decision Letter for (RSOS-202226.R0)

See Appendix A.

## Decision letter (RSOS-202226.R1)

The editorial office reopened on 4 January 2021. We are working hard to catch up after the festive break. If you need advice or an extension to a deadline, please do not hesitate to let us know -- we will continue to be as flexible as possible to accommodate the changing COVID situation. We wish you a happy New Year, and hope 2021 proves to be a better year for everyone.

Dear Dr Louis,

It is a pleasure to accept your manuscript entitled "Population-specific sex and size variation in long-term foraging ecology of belugas and narwhals" in its current form for publication in Royal Society Open Science.

You can expect to receive a proof of your article in the near future. Please contact the editorial office ([openscience@royalsociety.org](mailto:openscience@royalsociety.org)) and the production office ([openscience\\_proofs@royalsociety.org](mailto:openscience_proofs@royalsociety.org)) to let us know if you are likely to be away from e-mail contact -- if you are going to be away, please nominate a co-author (if available) to manage the proofing process, and ensure they are copied into your email to the journal.

Due to rapid publication and an extremely tight schedule, if comments are not received, your paper may experience a delay in publication.

Please see the Royal Society Publishing guidance on how you may share your accepted author manuscript at <https://royalsociety.org/journals/ethics-policies/media-embargo/>.

Thank you for your fine contribution. On behalf of the Editors of Royal Society Open Science, we look forward to your continued contributions to the Journal.

Kind regards,  
Royal Society Open Science Editorial Office  
Royal Society Open Science  
[openscience@royalsociety.org](mailto:openscience@royalsociety.org)

on behalf of Prof Pete Smith (Subject Editor)  
[openscience@royalsociety.org](mailto:openscience@royalsociety.org)

Follow Royal Society Publishing on Twitter: @RSocPublishing  
Follow Royal Society Publishing on Facebook:  
<https://www.facebook.com/RoyalSocietyPublishing.FanPage/>

Read Royal Society Publishing's blog:  
<https://royalsociety.org/blog/blogsearchpage/?category=Publishing>

## Appendix A

Dear Dr Louis

On behalf of the Editors, we are pleased to inform you that your Manuscript RSOS-202226 "Population-specific sex and size variation in long-term foraging ecology of belugas and narwhals" has been accepted for publication in Royal Society Open Science subject to minor revision in accordance with the referees' reports. Please find the referees' comments along with any feedback from the Editors below my signature.

We invite you to respond to the comments and revise your manuscript. Below the referees' and Editors' comments (where applicable) we provide additional requirements. Final acceptance of your manuscript is dependent on these requirements being met. We provide guidance below to help you prepare your revision.

Please submit your revised manuscript and required files (see below) no later than 7 days from today's (ie 06-Jan-2021) date. Note: the ScholarOne system will 'lock' if submission of the revision is attempted 7 or more days after the deadline. If you do not think you will be able to meet this deadline please contact the editorial office immediately.

Please note article processing charges apply to papers accepted for publication in Royal Society Open Science (<https://royalsocietypublishing.org/rsos/charges>). Charges will also apply to papers transferred to the journal from other Royal Society Publishing journals, as well as papers submitted as part of our collaboration with the Royal Society of Chemistry (<https://royalsocietypublishing.org/rsos/chemistry>). Fee waivers are available but must be requested when you submit your revision (<https://royalsocietypublishing.org/rsos/waivers>).

Thank you for submitting your manuscript to Royal Society Open Science and we look forward to receiving your revision. If you have any questions at all, please do not hesitate to get in touch.

Kind regards,  
Royal Society Open Science Editorial Office  
Royal Society Open Science  
[openscience@royalsociety.org](mailto:openscience@royalsociety.org)

on behalf of Prof Pete Smith (Subject Editor)  
[openscience@royalsociety.org](mailto:openscience@royalsociety.org)

>Dear Editor,

We are pleased to hear that our manuscript is accepted. Please find below our responses to the reviewers' comments.

On behalf of the co-authors,

Marie Louis



Reviewer comments to Author:

Reviewer: 1

Comments to the Author(s)

I have re-reviewed (I was reviewer 2 in Biology Letters submission) the paper by Louis et al. on sex- and size-based variation in foraging ecology of belugas and narwhals across space. They have done a great job incorporating previous reviewer comments and I only have one minor comment. I look forward to seeing this article published in Royal Society Open Science.

Line 87-90 – In this objectives sentence - I suggesting removing the inference in the ability to test for differences in foraging ecology of beluga and narwhal in relation to interspecific competition. Again, this is not directly tested in this study due to the lack of prey availability and prey abundance data. I think it's fine to have the listed objective as, "To elucidate differences related to sex and size, we investigated whether beluga and narwhal foraging ecology differs across space" and to just speculate on the potential competition aspects between beluga and narwhal in the discussion.

>Dear reviewer,

Thank you for your positive feedback.

We have made the change in the objective sentence L88-90 and it now reads as you suggest: "To elucidate differences related to sex and size, we investigated whether beluga and narwhal foraging ecology differs across space."

On behalf of the co-authors,

Marie Louis

Reviewer: 2

Comments to the Author(s)

After reading the revised manuscript by Louis et al., I maintain my earlier assessment, that the paper is concise, well-written and neatly presented. I found the methods and statistical analyses to be appropriate and well-conducted.

I appreciate the thoughtful and thorough manner with which the authors responded to my previous general and specific comments. They have adequately addressed the concerns I had and therefore I have no comments on the revised version.

I believe that the manuscript represents a valuable contribution to the literature on cetacean resource use.

>Dear reviewer,

Thank you for your positive feedback.

On behalf of the co-authors,

Marie Louis
